# Supplementary material
Source: Research Square preprint supplement (doi:10.21203/rs.3.rs-9530668/v1)
Supplement: Supplementary file 1 [file dde7566afc91c3b657f2e5a2.docx]

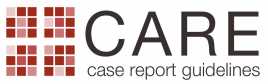

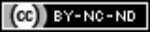

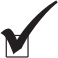
**CARE Checklist of information to include when writing a case report**

| **Topic** | **Item** | **Checklist item description** | **Reported on Line** |
| --- | --- | --- | --- |
| **Title** | **1** | The diagnosis or intervention of primary focus followed by the words “case report” | 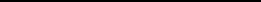 1-3 |
| **Key Words** | **2** | 2 to 5 key words that identify diagnoses or interventions in this case report, including "case report" | 67-68 |
| **Abstract** | **3a** | Introduction: What is unique about this case and what does it add to the scientific literature? | 47-51 |
| **(no references)** | **3b** | Main symptoms and/or important clinical findings | 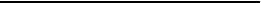 52-66 |
| **3c** | The main diagnoses, therapeutic interventions, and outcomes . . . . . . . . . . . . . . . . . . . . . . . . . . . . . . . . . . . . . . . . . . . | 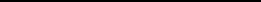 55-60 |
| **3d** | Conclusion—What is the main “take-away” lesson(s) from this case? | 61-64 |
| **Introduction** | **4** | One or two paragraphs summarizing why this case is unique (**may include references**) | 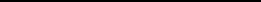 71-84 |
| **Patient Information** | **5a** | De-identified patient specific information | 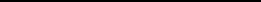 86-87 |
| **5b** | Primary concerns and symptoms of the patient | 87-88 |
| **5c** | Medical, family, and psycho-social history including relevant genetic information | 87-88 |
| **5d** | Relevant past interventions with outcomes | 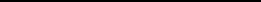 88-96 |
| **Clinical Findings** | **6** | Describe significant physical examination (PE) and important clinical findings | 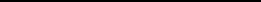 96-103 |
| **Timeline** | **7** | Historical and current information from this episode of care organized as a timeline | 104-108 |
| **Diagnostic** | **8a** | Diagnostic testing (such as PE, laboratory testing, imaging, surveys) | 108-110 |
| **Assessment** | **8b** | Diagnostic challenges (such as access to testing, financial, or cultural) | 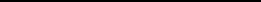 104-106 |
| **8c** | Diagnosis (including other diagnoses considered) | 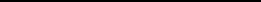 110-112 |
| **8d** | Prognosis (such as staging in oncology) where applicable | 112-116 |
| **Therapeutic** | **9a** | Types of therapeutic intervention (such as pharmacologic, surgical, preventive, self-care) | 105-112 |
| **Intervention** | **9b** | Administration of therapeutic intervention (such as dosage, strength, duration) | 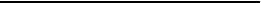 105-112 |
| **9c** | Changes in therapeutic intervention (with rationale) | 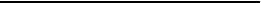 107-112 |
| **Follow-up and** | **10a** | Clinician and patient-assessed outcomes (if available) | 112-116 |
| **Outcomes** | **10b** | Important follow-up diagnostic and other test results | 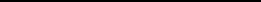 112-116 |
| **10c** | Intervention adherence and tolerability (How was this assessed?) | 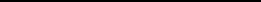 112-116 |
| **10d** | Adverse and unanticipated events | 112-116 |
| **Discussion** | **11a** | A scientific discussion of the strengths AND limitations associated with this case report | 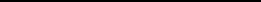 118-122, 160-161 |
| **11b** | Discussion of the relevant medical literature **with references** | 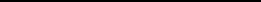 135-140, 147-149 |
| **11c** | The scientific rationale for any conclusions (including assessment of possible causes) | 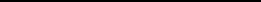 141-154 |
| **11d** | The primary “take-away” lessons of this case report (without references) in a one paragraph conclusion | 155-161 |
| **Patient Perspective** | **12** | The patient should share their perspective in one to two paragraphs on the treatment(s) they received | 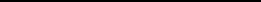 112-116 |
| **Informed Consent** | **13** | Did the patient give informed consent? Please provide if requested | **Yes √ No** 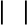 |
